# Supplementary material for: Lower Salinomycin Concentration Increases Apoptotic Detachment in High-Density Cancer Cells
Source: Int J Mol Sci. 2012 Oct 12;13(10):13169–82. doi: 10.3390/ijms131013169 (PMC3497319; doi:10.3390/ijms131013169)
Supplement: Supplementary file 1 [file ijms-13-13169-s001.pdf]

## Supplementary Information

**Figure S1.** Reduction of attached cell numbers by Sal positively correlates with increased cell density. (A–C) Hs578T cells at  $2 \times 10^5$ ,  $4 \times 10^5$ , or  $6 \times 10^5$  were plated on 60 mm-diameter dishes. The cells were then incubated for 2 days with 5  $\mu$ M Sal (Sal-5), 0.5  $\mu$ M Sal (Sal-0.5), 0.01  $\mu$ M Sal (Sal-0.01), or DMSO (Con). White bars indicate cell numbers after 2 days of Sal treatment. Black bars indicate the initial cell numbers ( $2 \times 10^5$  or  $4 \times 10^5$ ) before drug treatments. The cells were counted after 2 days.

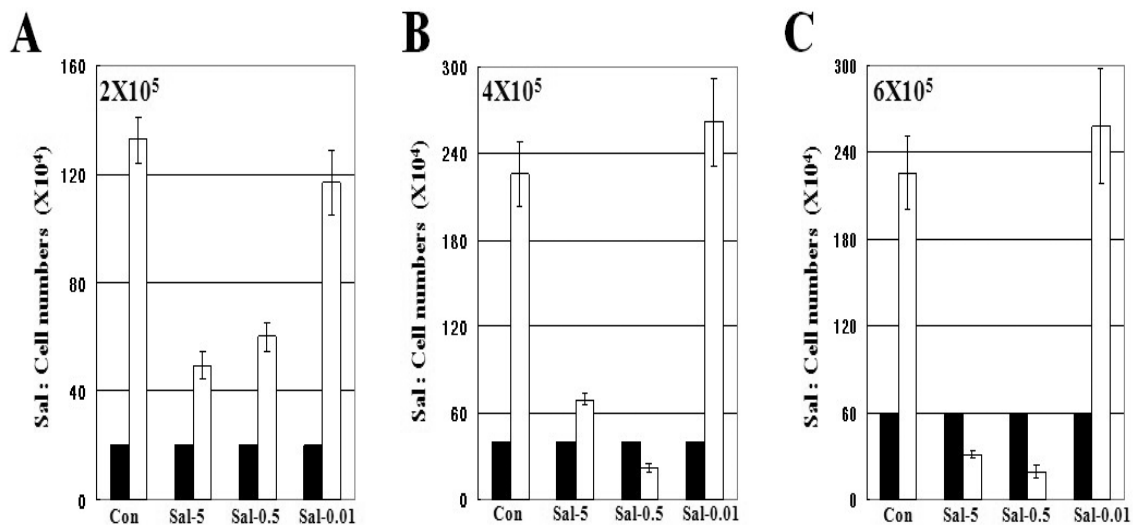

**Figure S2.** ETO does not increase the sensitization effect for detachment at a lower concentration in high density culture. (A) Hs578T cells ( $4 \times 10^5$ ) were plated on 60 mm-diameter dishes. The cells were then incubated for 2 days with 100  $\mu$ M ETO (ETO-100), 20  $\mu$ M ETO (ETO-20), or DMSO (Con). After 2 days, the cells were observed using an inverted microscope with a 5X objective lens. (B) Hs578T cells ( $4 \times 10^5$ ) were plated on 60 mm-diameter dishes. The cells were incubated for 2 days with 100  $\mu$ M ETO (ETO-100), 10  $\mu$ M ETO (ETO-10), or DMSO (Con). White bars indicate cell numbers after 2 days of ETO treatment. Black bars indicate the initial cell numbers ( $4 \times 10^5$ ) before drug treatments. The attached cells were counted after 2 days. (C) Hs578T cells ( $4 \times 10^5$ ) were plated on 60 mm-diameter dishes. The cells were incubated for 2 days with 100  $\mu$ M ETO (ETO-100), 10  $\mu$ M ETO (ETO-10), or DMSO (Con). White bars indicate cell number after 2 days of ETO treatment. Black bars indicate initial cell numbers ( $4 \times 10^5$ ) before drug treatments. Supernatant detached cells were counted after 2 days. (D) Hs578T cells ( $4 \times 10^5$ ) were plated on 96-well plates. The cells were incubated for 2 days with 100  $\mu$ M ETO (ETO-100), 20  $\mu$ M ETO (ETO-20), or DMSO (Con). Cell viability (live/dead assay) was measured after 2 days. The cells were observed using an inverted fluorescence microscope with a 5 $\times$  objective lens. (E) Hs578T cells ( $4 \times 10^5$ ) were plated on 60 mm-diameter dishes. The cells were incubated for 2 days with 100  $\mu$ M ETO (ETO-100), 50  $\mu$ M ETO (ETO-50), 20  $\mu$ M ETO (ETO-20), 10  $\mu$ M ETO (ETO-10), 5  $\mu$ M ETO (ETO-5), or DMSO (Con). White bars indicate cell numbers after 2 days of ETO treatment. Black bars indicate initial cell number ( $4 \times 10^5$ ) before drug treatments. Detached supernatant cells were counted after 2 days. (F) Hs578T cells ( $4 \times 10^5$ ) were

plated on 96-well plates. The cells were incubated for 2 days with 10  $\mu$ M ETO (ETO-10), 2  $\mu$ M ETO (ETO-2), or DMSO (Con). Cell viability (live/dead assay) was measured after 2 days. The cells were observed under an inverted fluorescence microscope with a 5 $\times$  objective lens.

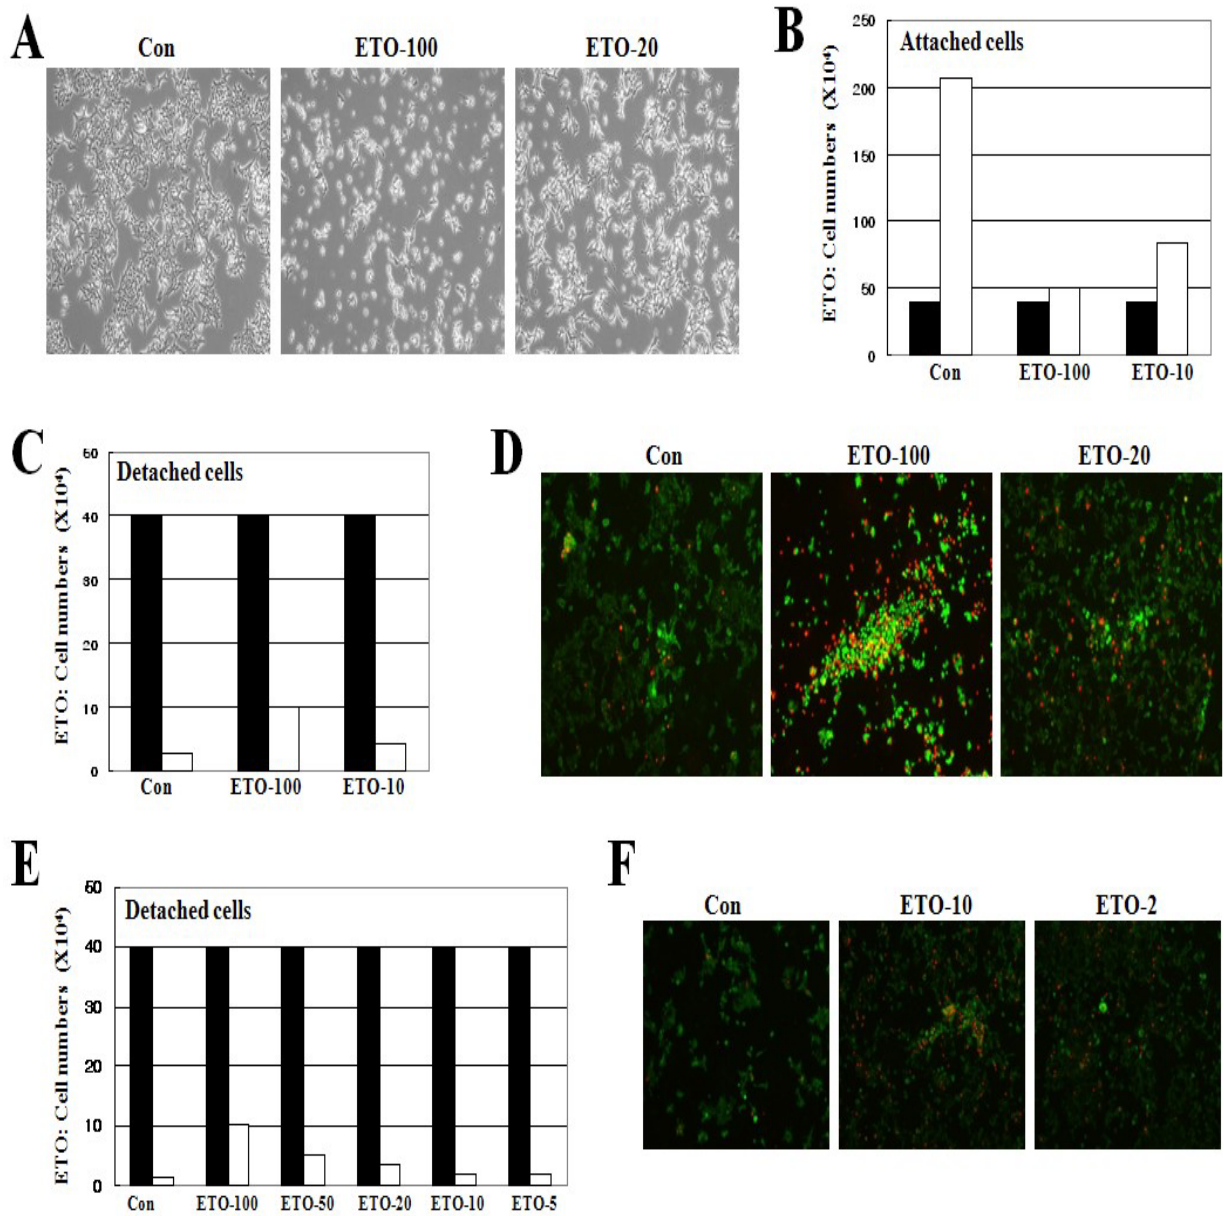

Sup Fig. 2

**Figure S3.** The 0.5  $\mu\text{M}$  Sal treatment may appreciably increase cellular toxicity in high density cultures. Hs578T cells ( $4 \times 10^5$ ) were plated on 60 mm-diameter dishes. The cells were incubated for 2 days with 10  $\mu\text{M}$  Sal (Sal-10), 5  $\mu\text{M}$  Sal (Sal-5), 2  $\mu\text{M}$  Sal (Sal-2), 1  $\mu\text{M}$  Sal (Sal-1), 0.5  $\mu\text{M}$  Sal (Sal-0.5), 0.1  $\mu\text{M}$  Sal (Sal-0.1), 0.01  $\mu\text{M}$  Sal (Sal-0.01), or DMSO (Con). The cells were then stained with Rho after 2 days. FACS analysis was subsequently performed for the Rho stained cells.

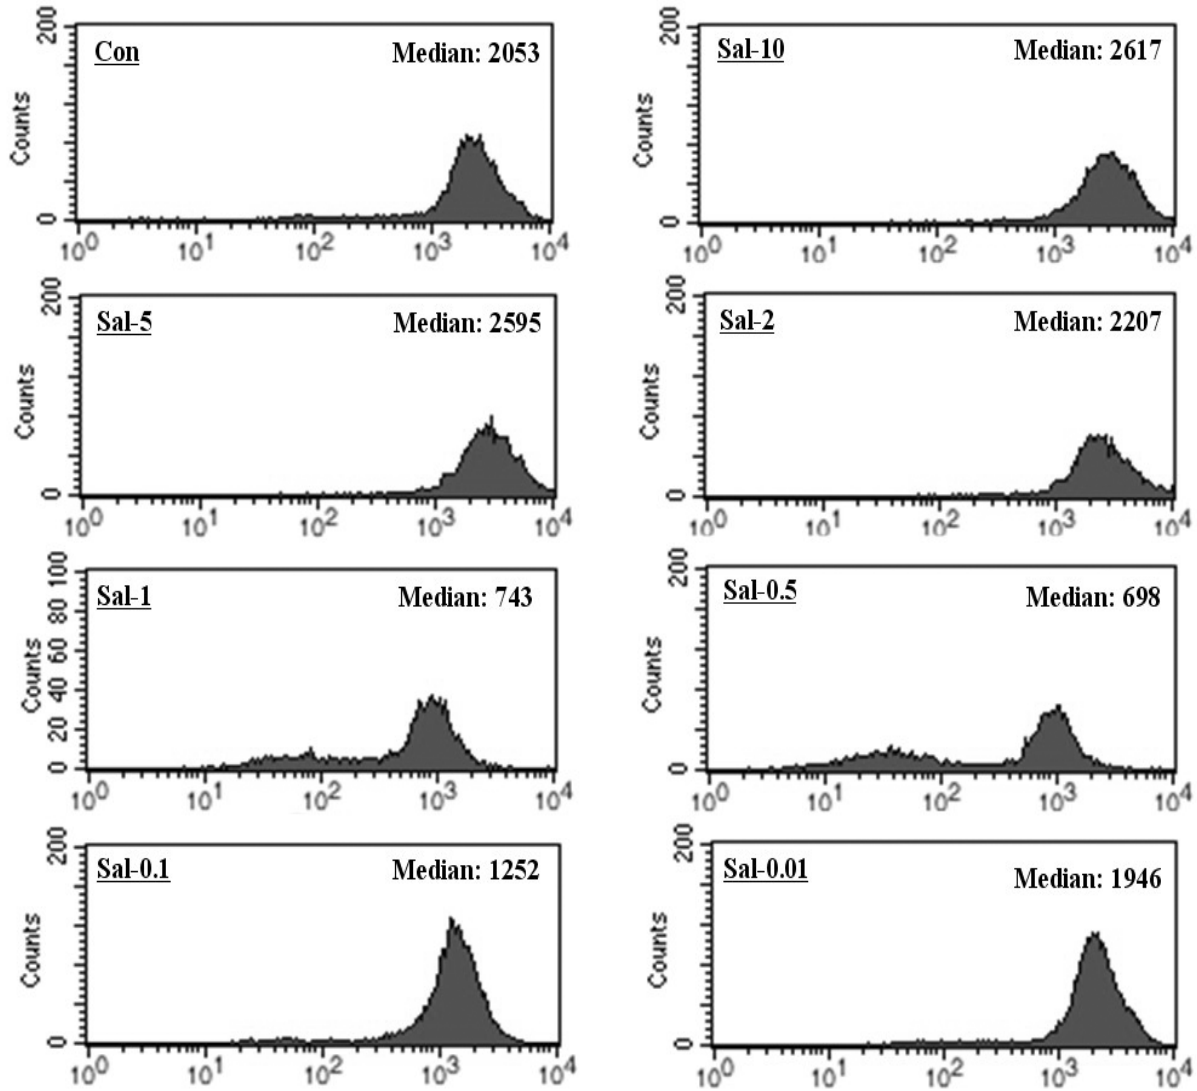

Sup Fig. 3

**Figure S4.** Increased cellular detachment caused by 0.5  $\mu\text{M}$  Sal treatment can be also observed at low cell density. (A) Hs578T cells ( $2 \times 10^5$ ) were plated on 60 mm-diameter dishes. The cells were then incubated for 2 days with 5  $\mu\text{M}$  Sal (Sal-5), 2  $\mu\text{M}$  Sal (Sal-2), 1  $\mu\text{M}$  Sal (Sal-1), 0.5  $\mu\text{M}$  Sal (Sal-0.5), 0.1  $\mu\text{M}$  Sal (Sal-0.1), or DMSO (Con). White bars indicate cell numbers after 2 days of Sal treatment. Black bars indicate the initial cell numbers ( $2 \times 10^5$ ) before drug treatments. Supernatant detached cells were counted after 2 days. The average total numbers of cells (attached and detached) are approximately  $15.5 \times 10^5$  for Con,  $6.8 \times 10^5$  for Sal-5,  $7.7 \times 10^5$  for Sal-2,  $7.7 \times 10^5$  for Sal-1,  $8.5 \times 10^5$  for Sal-0.5, and  $10.0 \times 10^5$  for Sal-0.1. (B) Hs578T cells ( $2 \times 10^5$ ) were

plated on 96-well plates. The cells were then incubated for 2 days with 5  $\mu\text{M}$  Sal (Sal-5), 1  $\mu\text{M}$  Sal (Sal-1), 0.5  $\mu\text{M}$  Sal (Sal-0.5), 0.1  $\mu\text{M}$  Sal (Sal-0.1), 0.01  $\mu\text{M}$  Sal (Sal-0.01), or DMSO (Con). Cell viability (live/dead assay) was measured after 2 days. The cells were observed using an inverted fluorescence microscope with a  $5\times$  objective lens. (C) Hs578T cells ( $2 \times 10^5$ ) were plated on 60 mm-diameter dishes. The cells were incubated for 2 days with 5  $\mu\text{M}$  Sal (Sal-5), 2  $\mu\text{M}$  Sal (Sal-2), 1  $\mu\text{M}$  Sal (Sal-1), 0.5  $\mu\text{M}$  Sal (Sal-0.5), 0.01  $\mu\text{M}$  Sal (Sal-0.01), or DMSO (Con). The cells were stained with Rho after 2 days. FACS analysis was subsequently performed for the Rho stained cells.

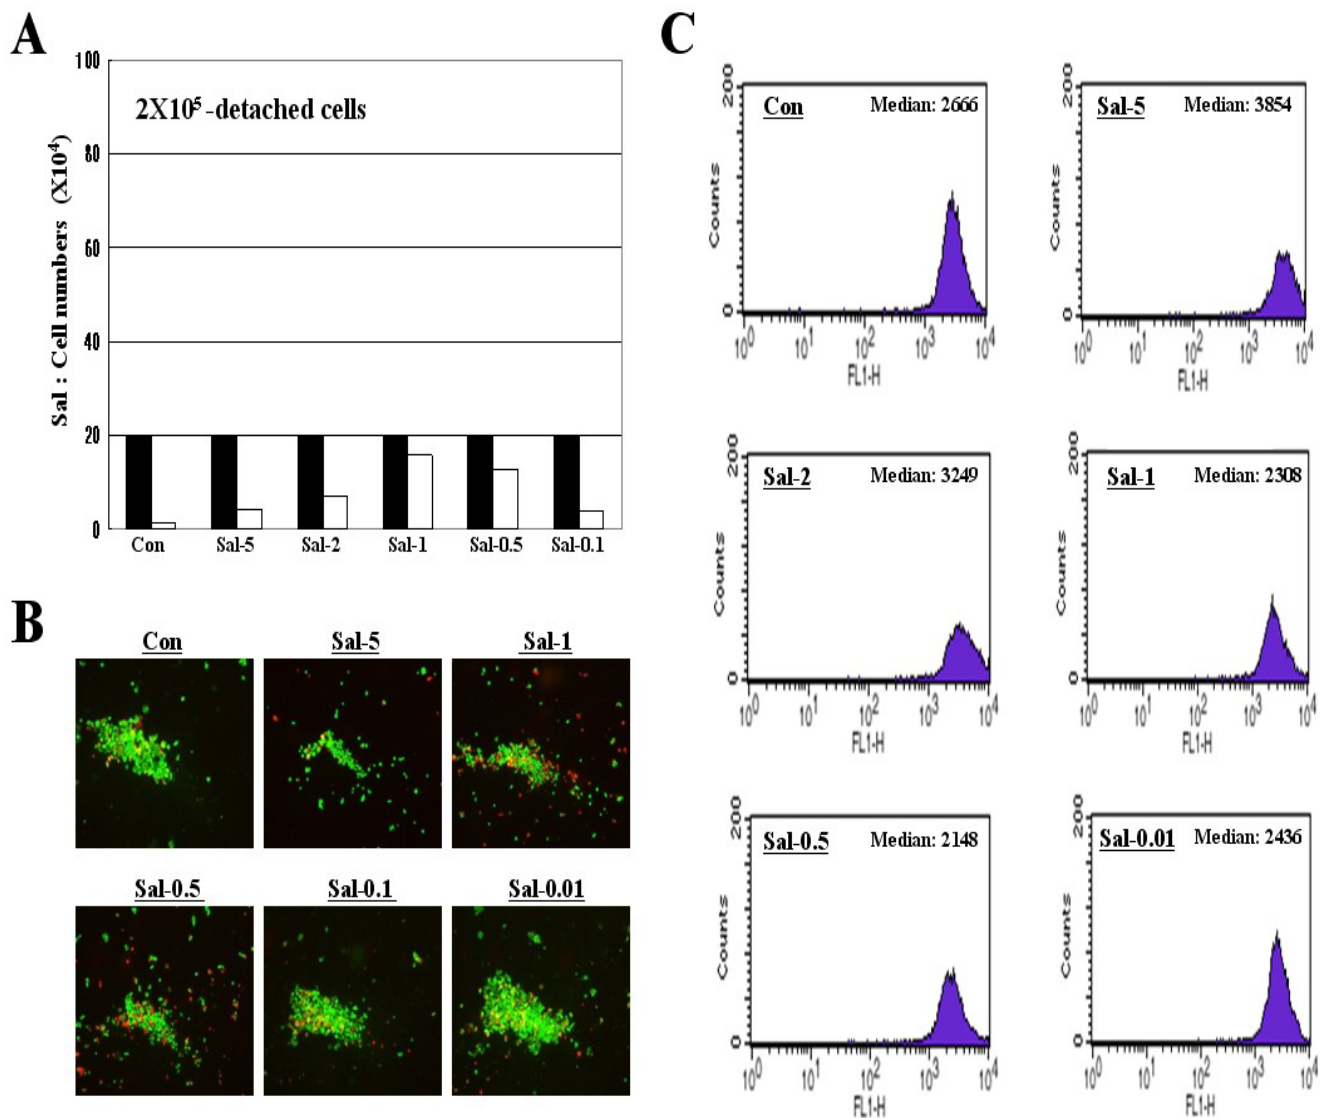

Sup Fig. 4
